# Supplementary material for: Inhibition of DXR in the MEP pathway with lipophilic N-alkoxyaryl FR900098 analogs
Source: Royal Society of Chemistry journal article supplement (doi:10.1039/d3md00642e), 2024-01-01

## Inhibition of DXR in the MEP Pathway with Lipophilic *N*-alkoxyaryl FR900098 Analogs

Darean Bague<sup>†,a</sup>, Ruiqin Wang<sup>†,a</sup>, Dana Hodge<sup>§</sup>, Marwa O. Mikati<sup>#</sup>, Jose S. Roma<sup>‡</sup>, Helena I. Boshoff<sup>‡</sup>, Allyson L. Dailey<sup>⊥</sup>, Misgina Girma<sup>⊥</sup>, Robin D. Couch<sup>⊥</sup>, Audrey R. Odom John<sup>#,§</sup>, and Cynthia S. Dowd<sup>\*,†</sup>

### Supplementary Information

|                                                                                                         |    |
|---------------------------------------------------------------------------------------------------------|----|
| Figure S1. IC <sub>50</sub> curves for <i>P. falciparum</i> Dxr inhibition                              | S2 |
| Figure S2. IC <sub>50</sub> curves for <i>M. tuberculosis</i> Dxr inhibition                            | S6 |
| Figure S3. IC <sub>50</sub> curves for wild-type and <i>had1</i> mutant <i>P. falciparum</i> inhibition | S7 |
| Figure S4. Comparison charts for wild-type and <i>had1</i> mutant <i>P. falciparum</i> inhibition       | S9 |

Figure S1. IC<sub>50</sub> curves for *P. falciparum* Dxr inhibition

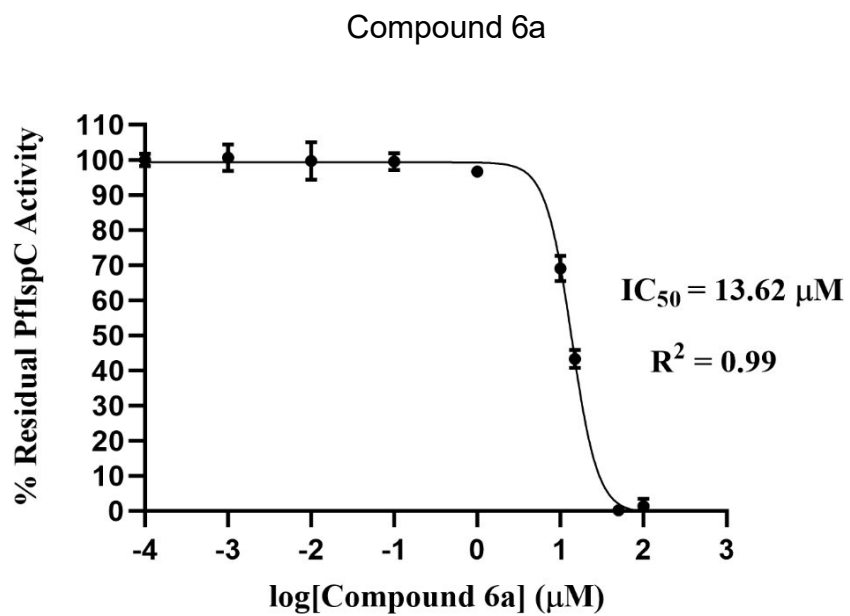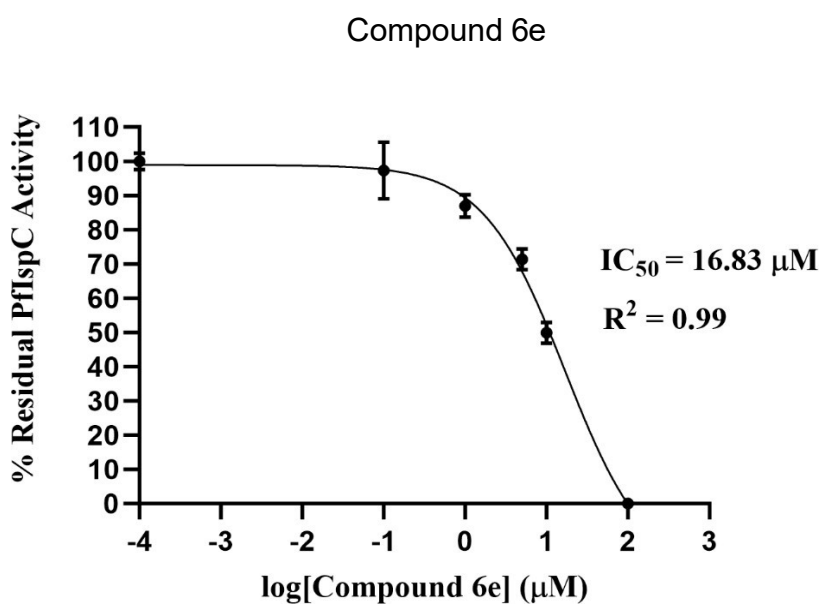

Compound 6f

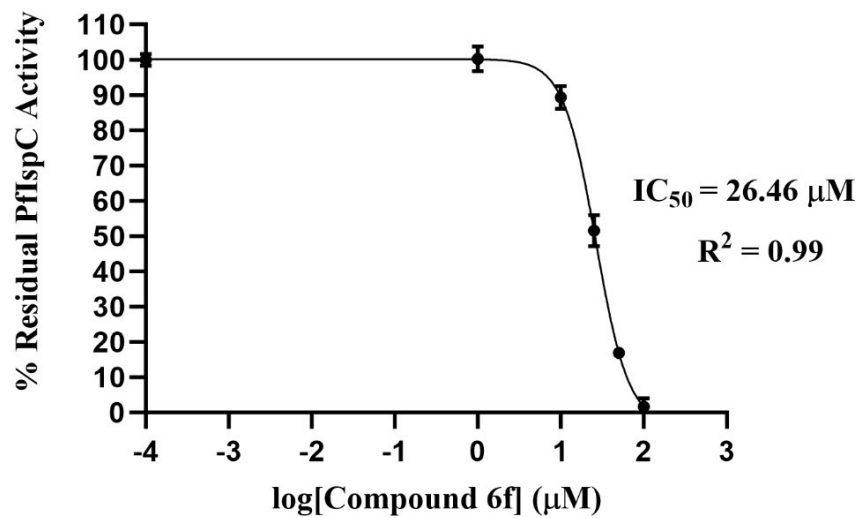

Compound 6j

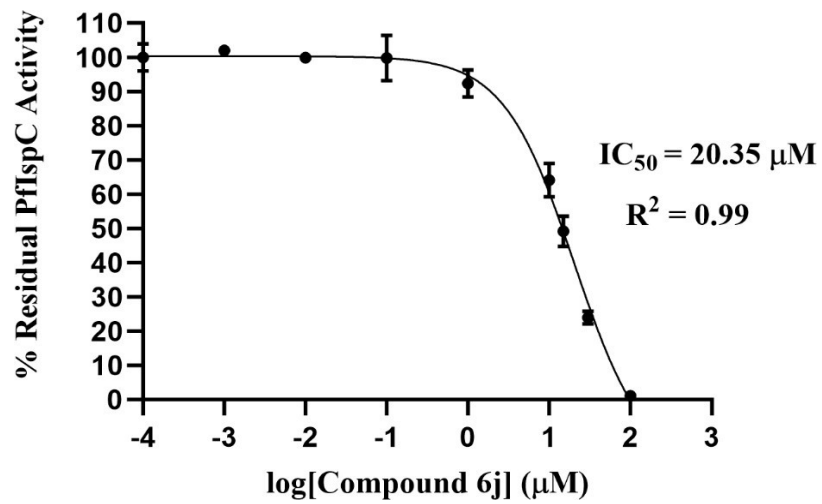

Compound 6k

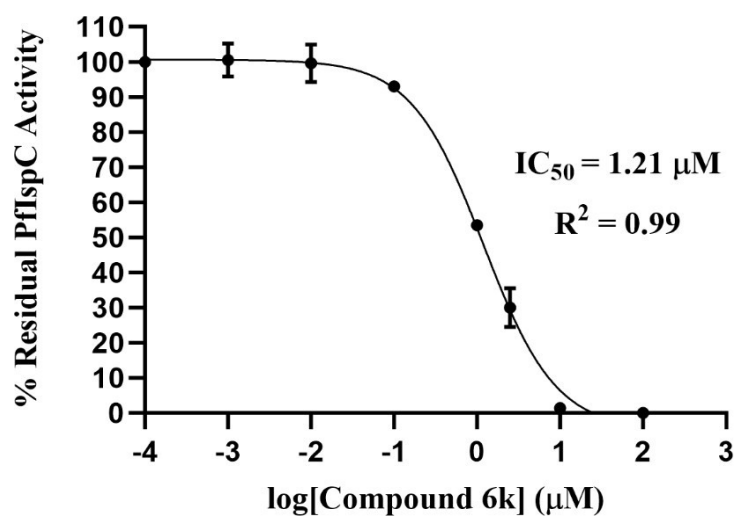

Compound 6l

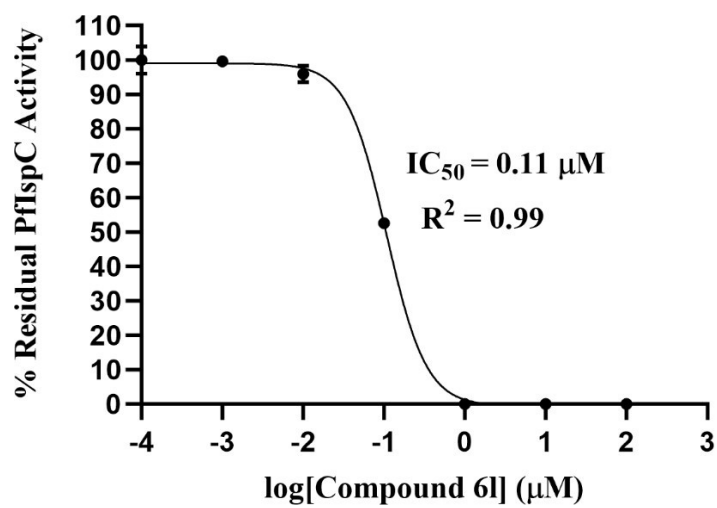

### Compound 6n

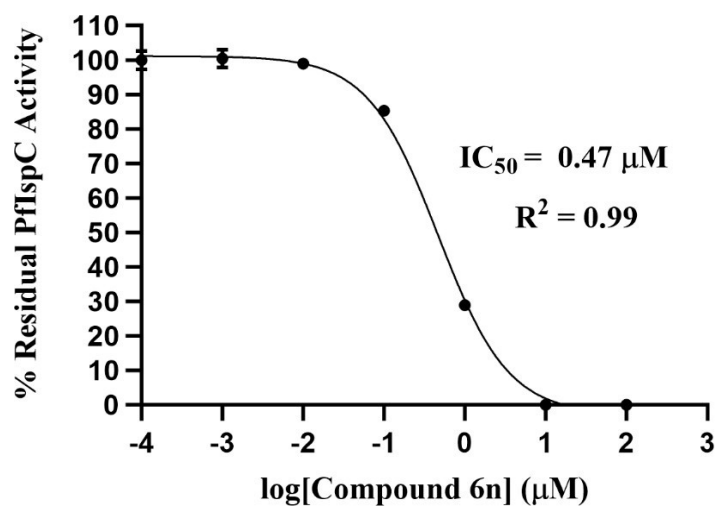

Figure S2. IC<sub>50</sub> curves for *M. tuberculosis* Dxr inhibition

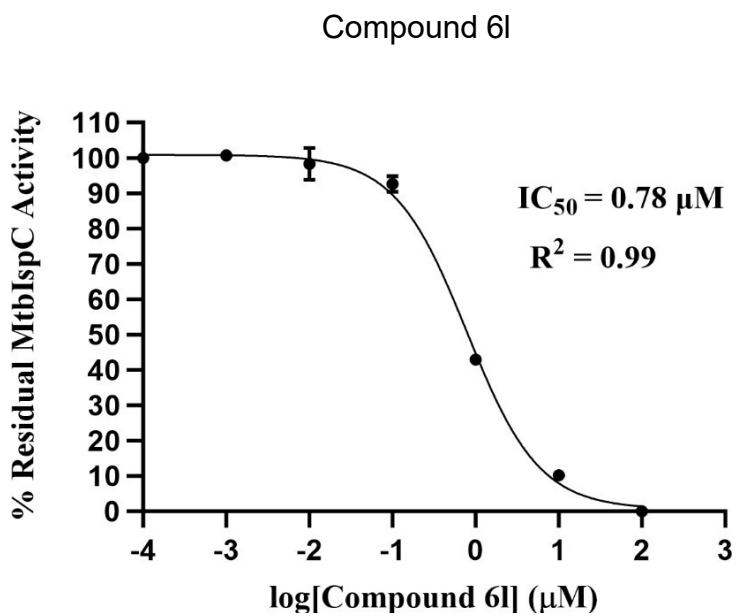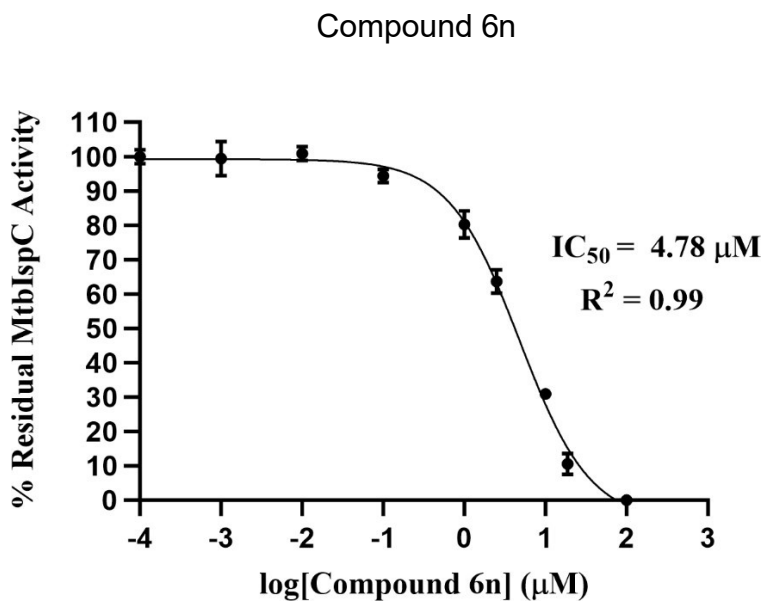

Figure S3. IC<sub>50</sub> curves for wild-type and *had1* mutant *P. falciparum* inhibition

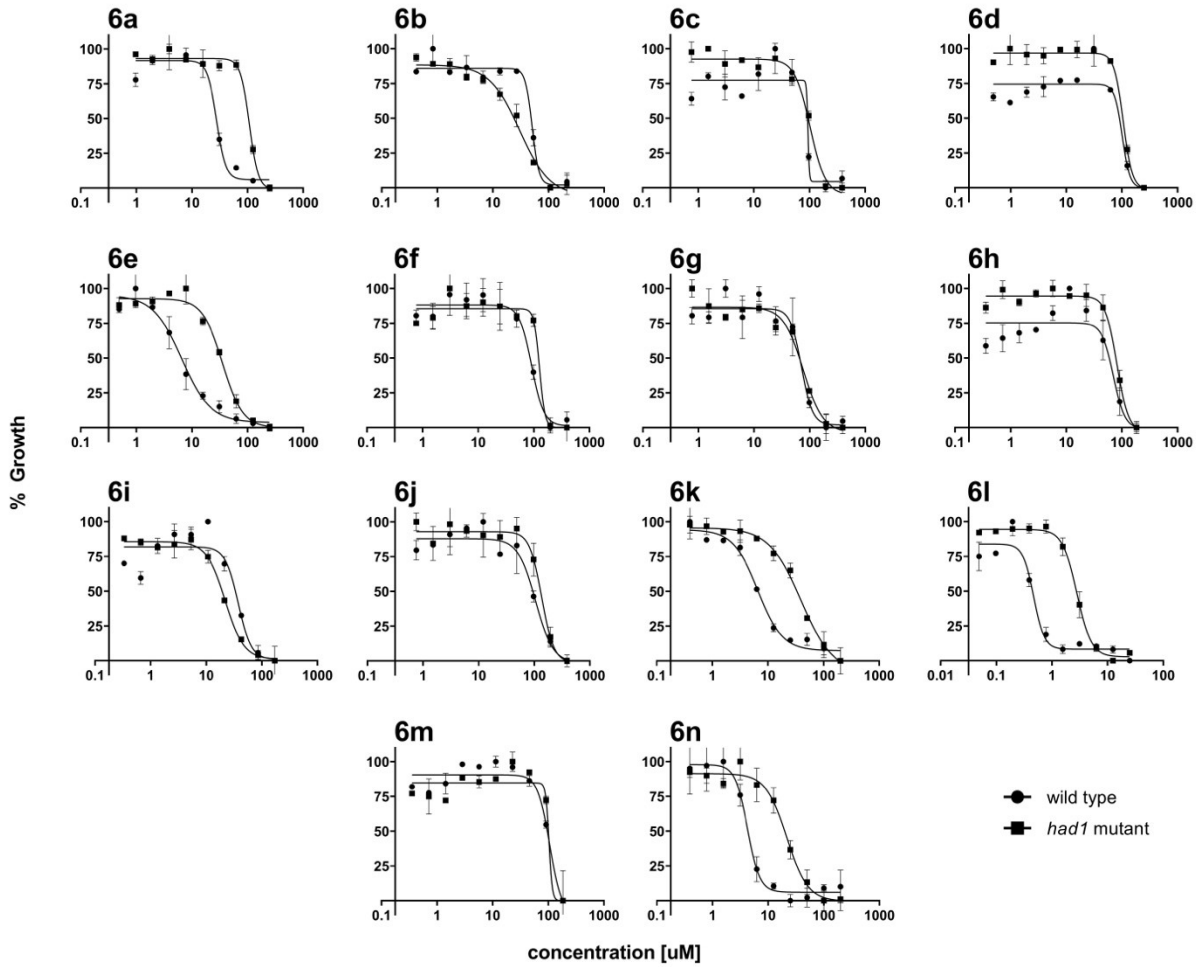

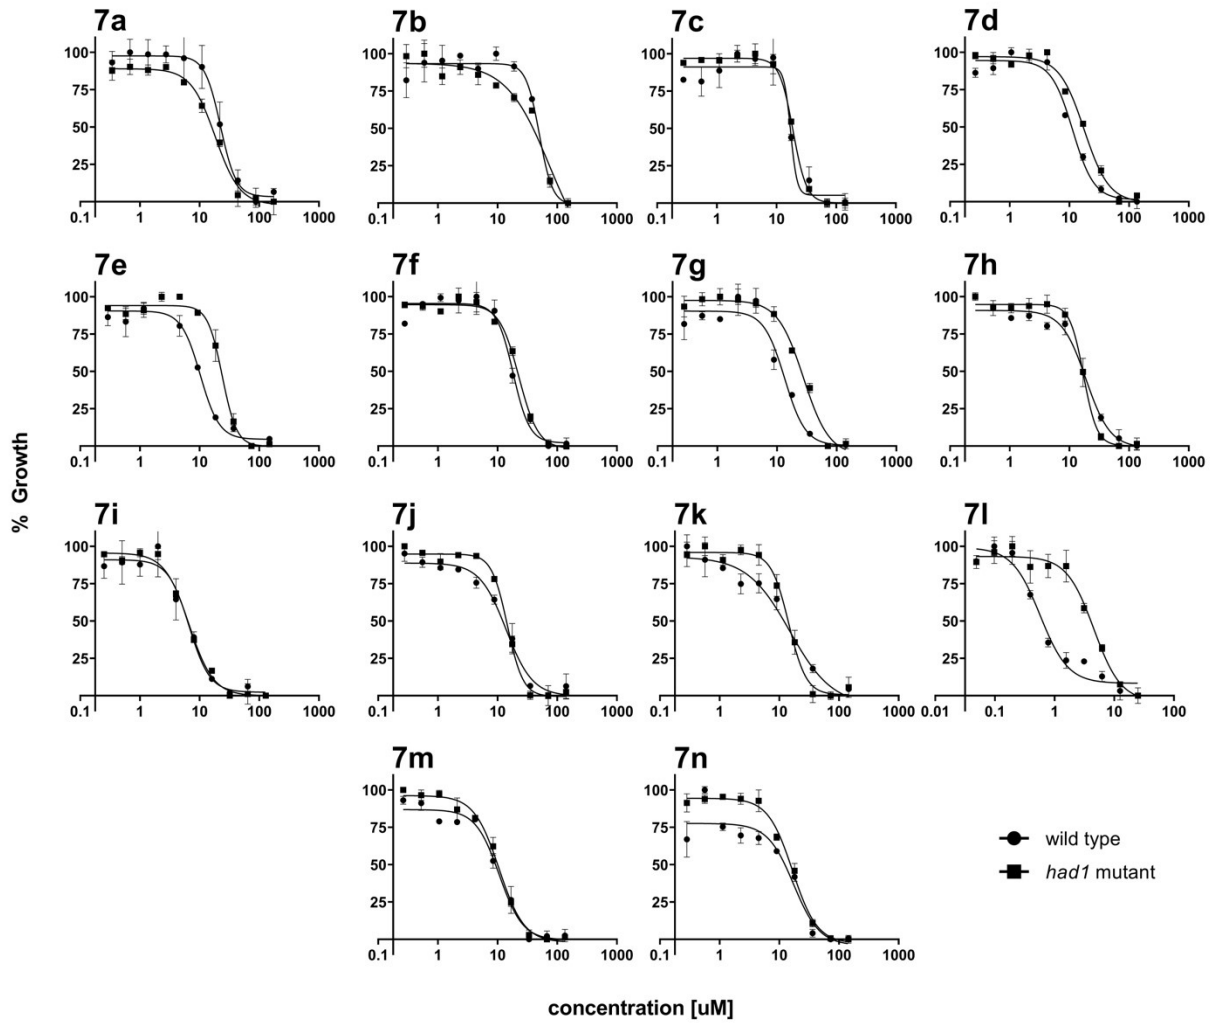



Figure S4. Comparison charts for wild-type and *had1* mutant *P. falciparum* inhibition

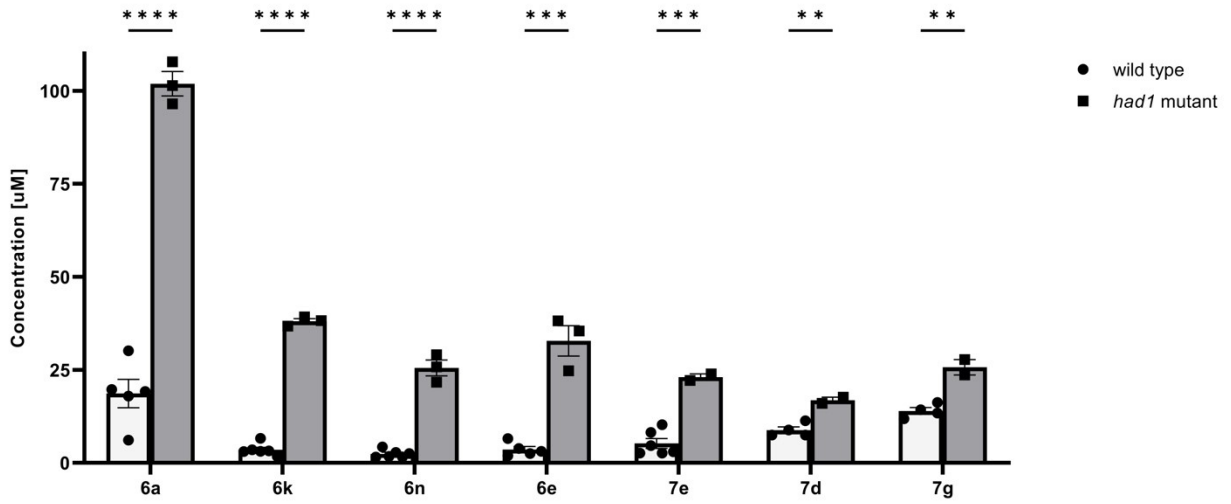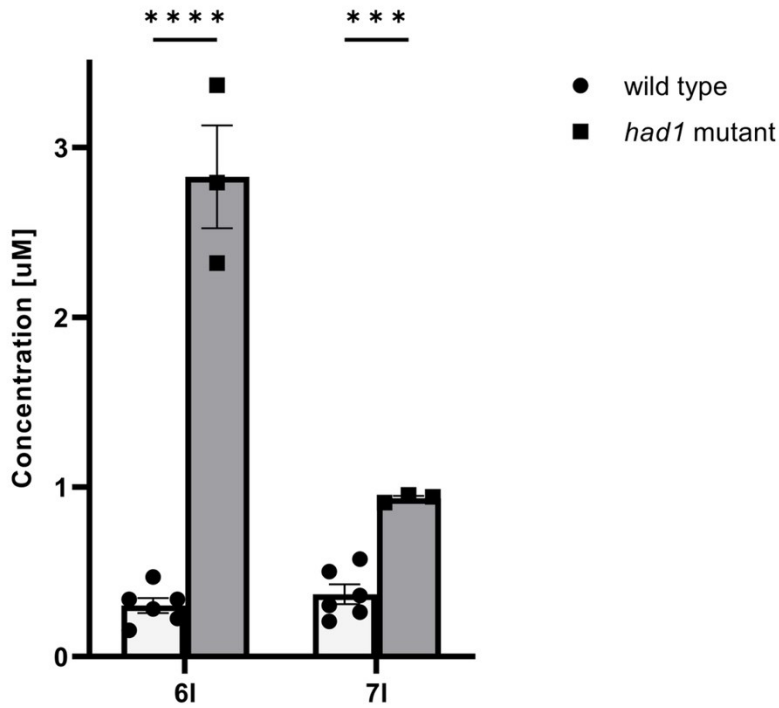

Supplement: d3md00642e1.pdf [file d3md00642e1.pdf]
